# Supplementary material for: Benzothiadiazole vs. iso-Benzothiadiazole: Synthesis, Electrochemical and Optical Properties of D–A–D Conjugated Molecules Based on Them
Source: MDPI journal article supplement (doi:10.3390/molecules26164931), 2021-08-14

## Supporting Information

# Benzothiadiazole *vs.* *iso*-benzothiadiazole: if the order of the addends changes, the sum does not stay the same

Nikita S. Gudim<sup>1</sup>, Ekaterina A. Knyazeva<sup>1,2</sup>, Ludmila V. Mihalchenko<sup>1</sup>, Ivan S. Golovanov<sup>1</sup>, Vadim V. Popov<sup>2</sup>, Natalia V. Obruchnikova<sup>1</sup>, and Oleg A. Rakitin<sup>1,2,\*</sup>

<sup>1</sup> N. D. Zelinsky Institute of Organic Chemistry, Russian Academy of Sciences, 119991 Moscow, Russian Federation; [orakitin@ioc.ac.ru](mailto:orakitin@ioc.ac.ru) (O.A.R.); [nikitosgudim@gmail.com](mailto:nikitosgudim@gmail.com) (N.S.G.); [katerina\\_knyazev@ioc.ac.ru](mailto:katerina_knyazev@ioc.ac.ru) (E.A.K.)

<sup>2</sup> Nanotechnology Education and Research Center, South Ural State University, 454080 Chelyabinsk, Russia; [rakitino@usu.ru](mailto:rakitino@usu.ru) (O.A.R.); [katerina\\_knyazev@mail.ru](mailto:katerina_knyazev@mail.ru) (E.A.K.)

\* Correspondence: [orakitin@ioc.ac.ru](mailto:orakitin@ioc.ac.ru); Tel.: +7 499 135 5327

## Table of Contents

|                                                   |    |
|---------------------------------------------------|----|
| 1. <sup>1</sup> H and <sup>13</sup> C NMR spectra | S2 |
| 2. DFT calculations                               | S3 |

## 1. $^1\text{H}$ and $^{13}\text{C}$ NMR spectra

### 4,7-di(thiophen-2-yl)benzo[d][1,2,3]thiadiazole (3a)

#### $^1\text{H}$ NMR (300 MHz)

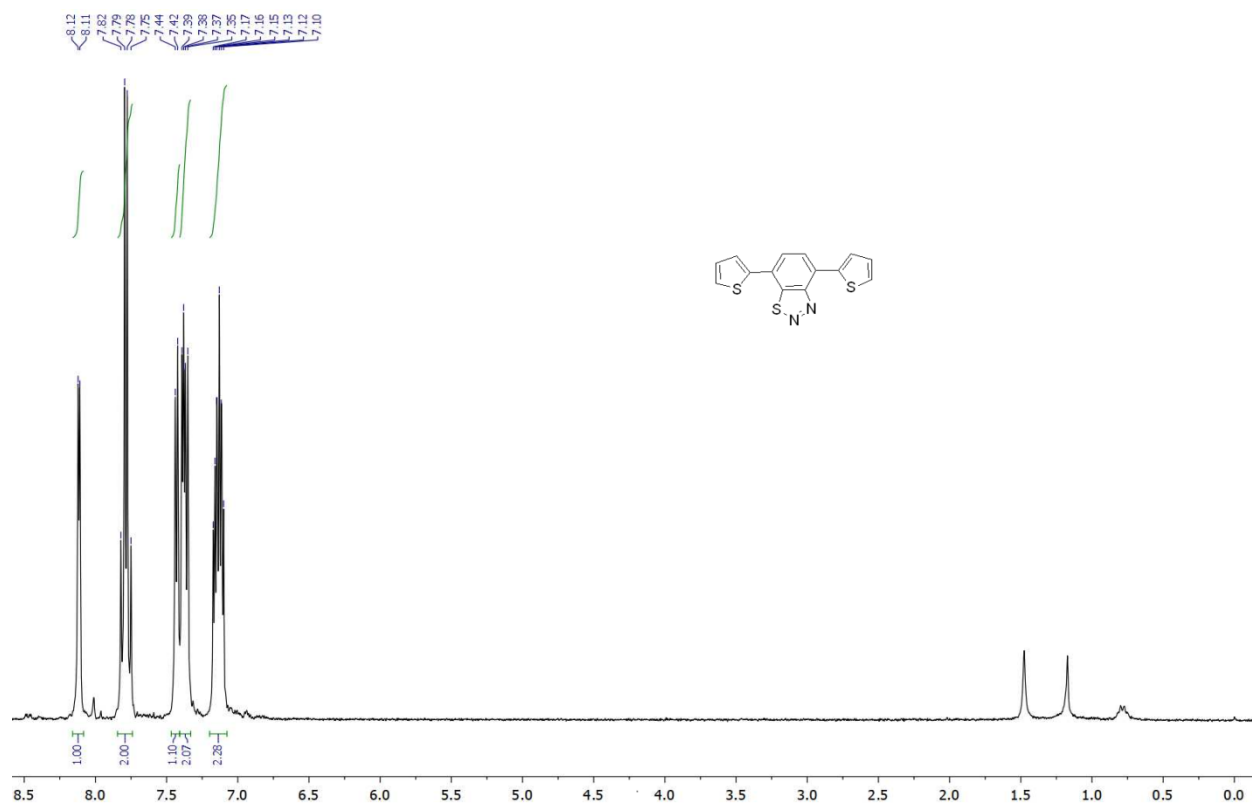

#### $^{13}\text{C}$ NMR (75 MHz)

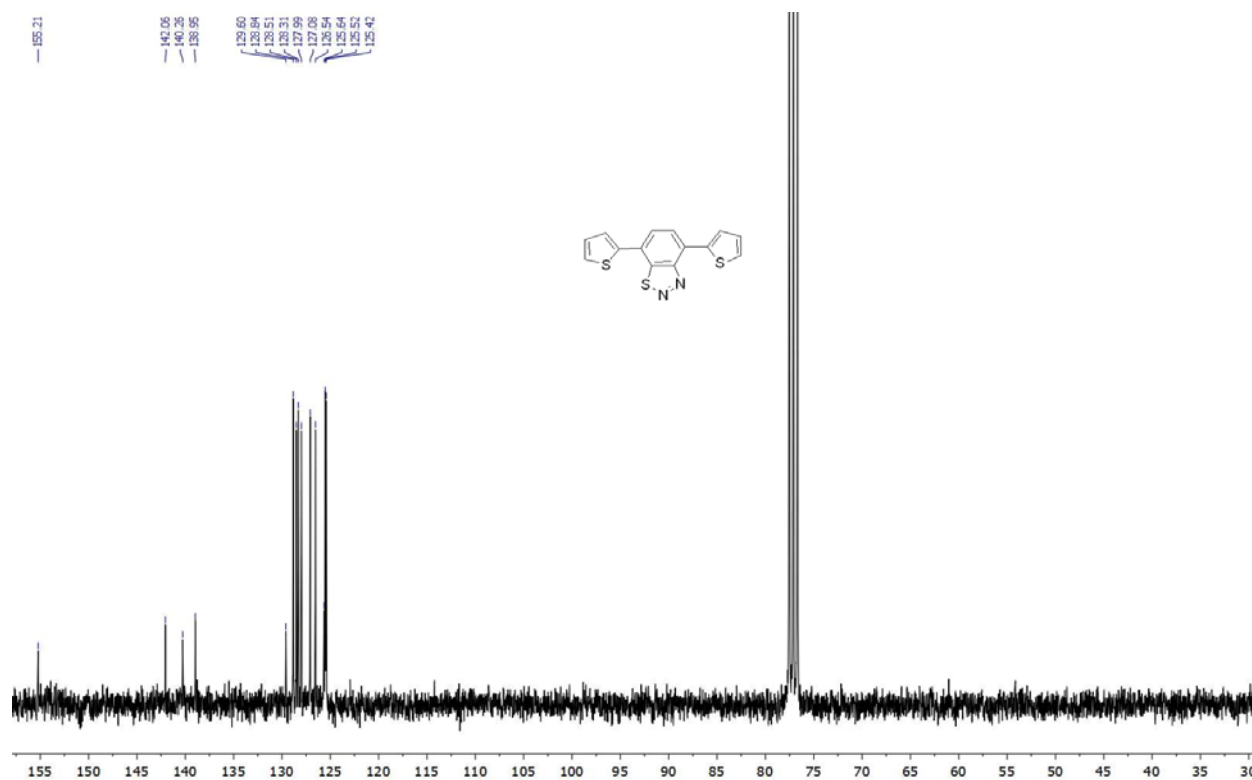

# 4,7-di(furan-2-yl)benzo[d][1,2,3]thiadiazole (3b)

## <sup>1</sup>H NMR (300 MHz)

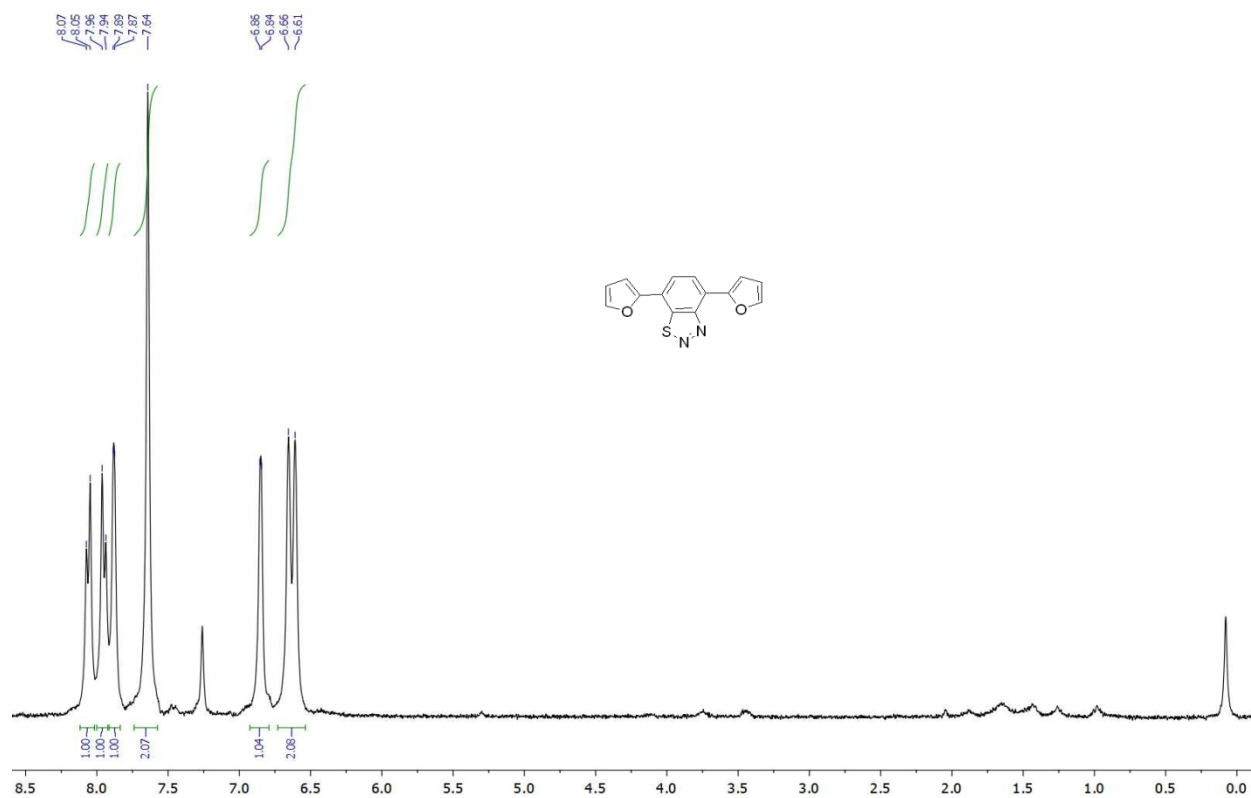

## <sup>13</sup>C NMR (75 MHz)

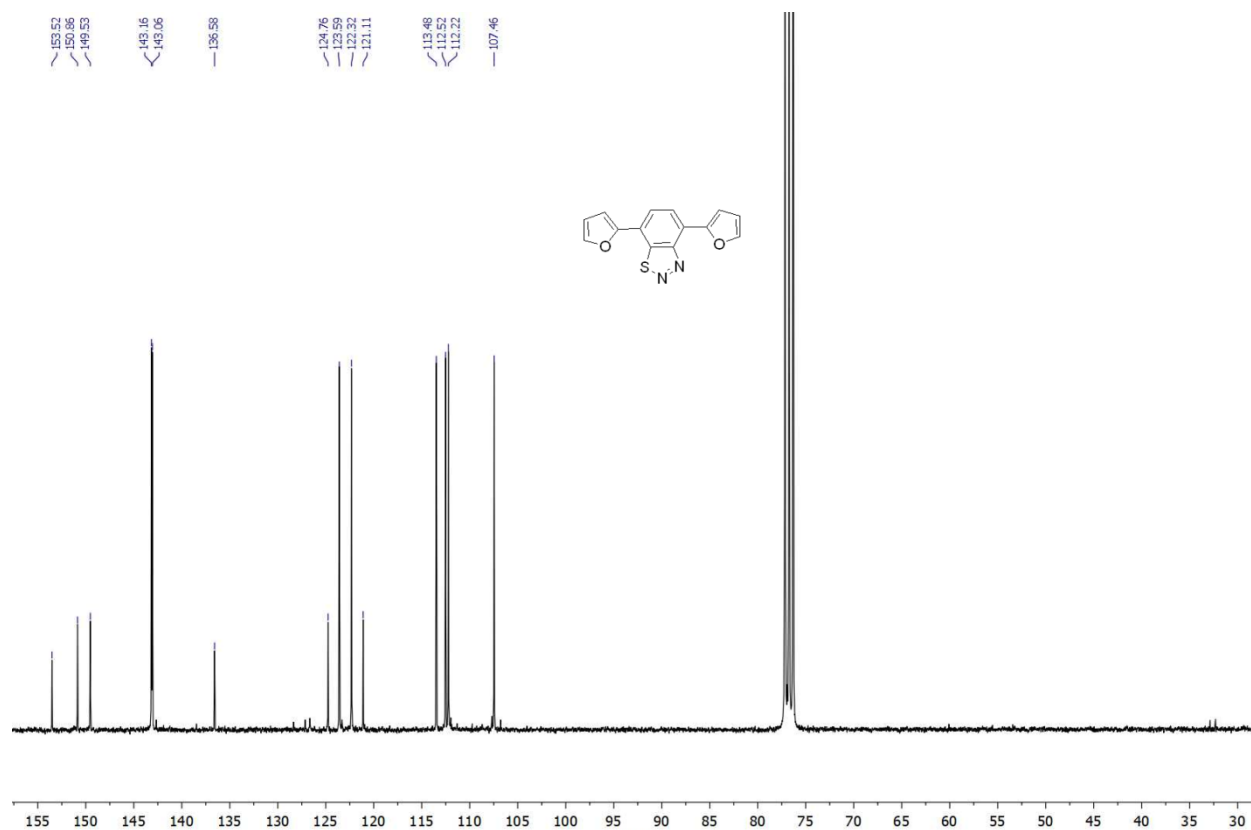

# 4,7-di(selenophen-2-yl)benzo[d][1,2,3]thiadiazole (3c)

## <sup>1</sup>H NMR (300 MHz)

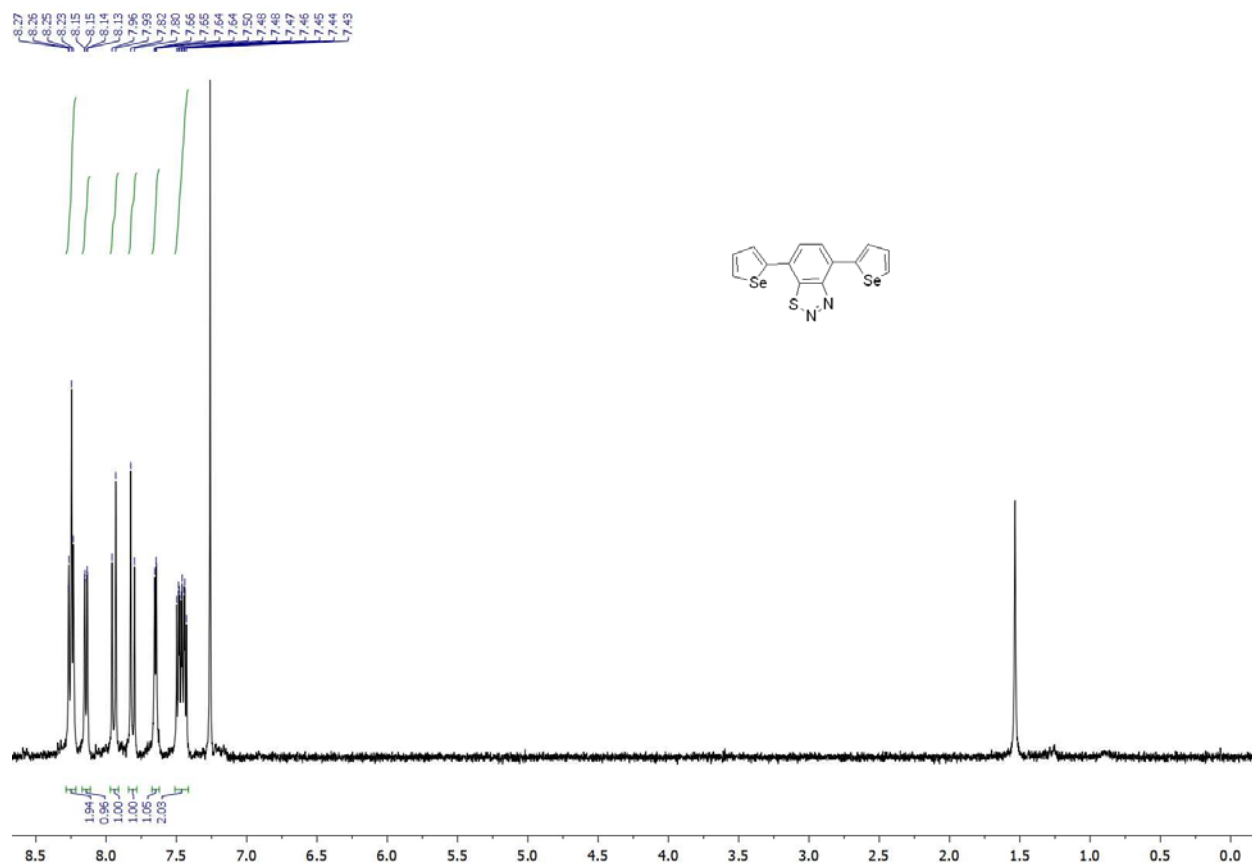

## <sup>13</sup>C NMR (75 MHz)

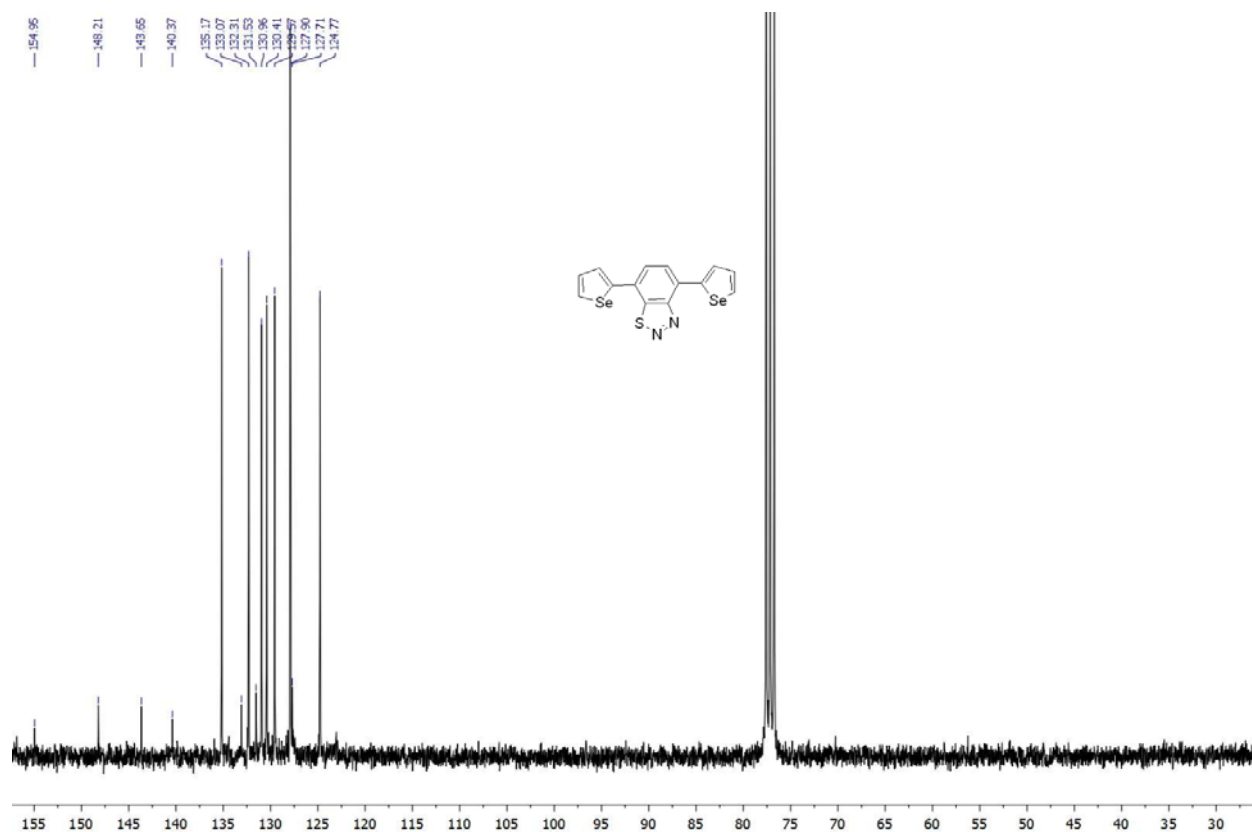

# 4,7-di([2,2'-bithiophen]-5-yl)benzo[d][1,2,3]thiadiazole (3d)

## <sup>1</sup>H NMR (300 MHz)

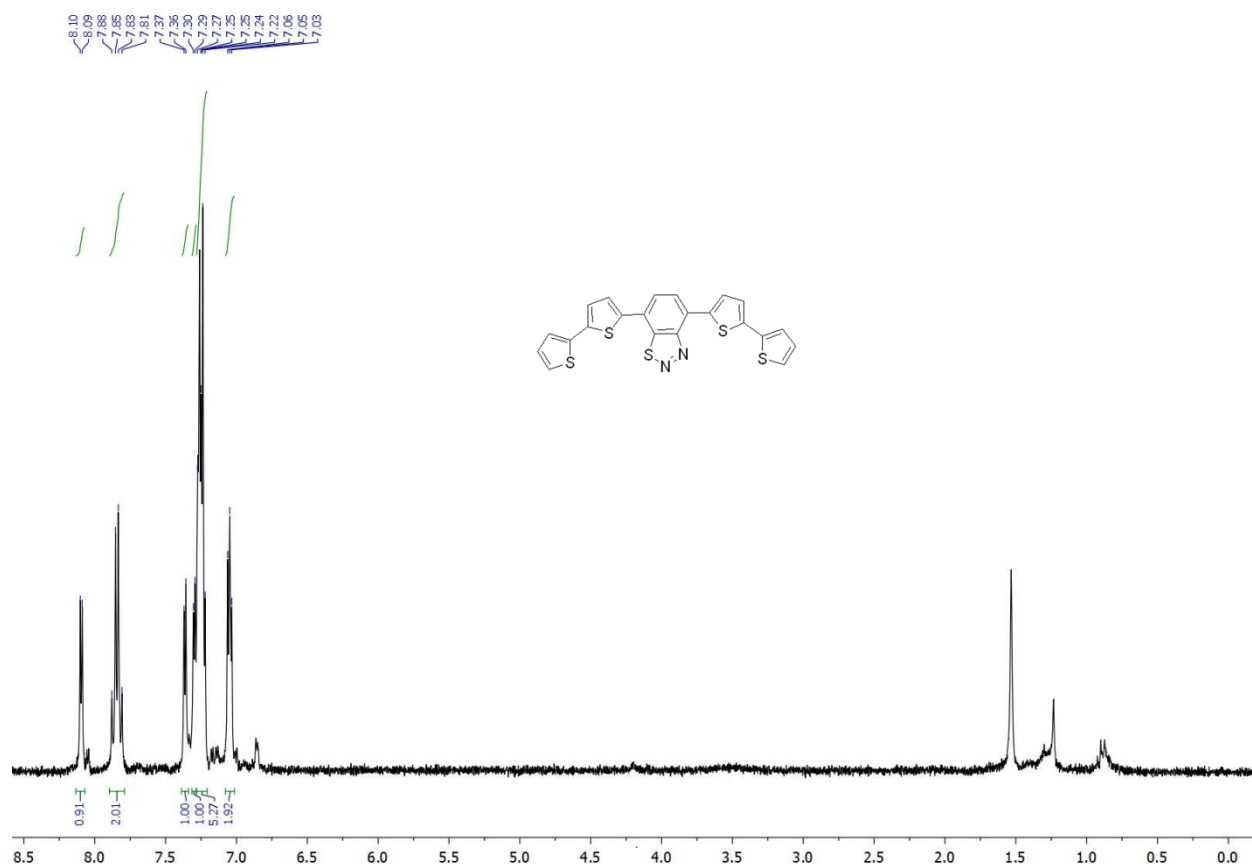

## <sup>13</sup>C NMR (75 MHz)

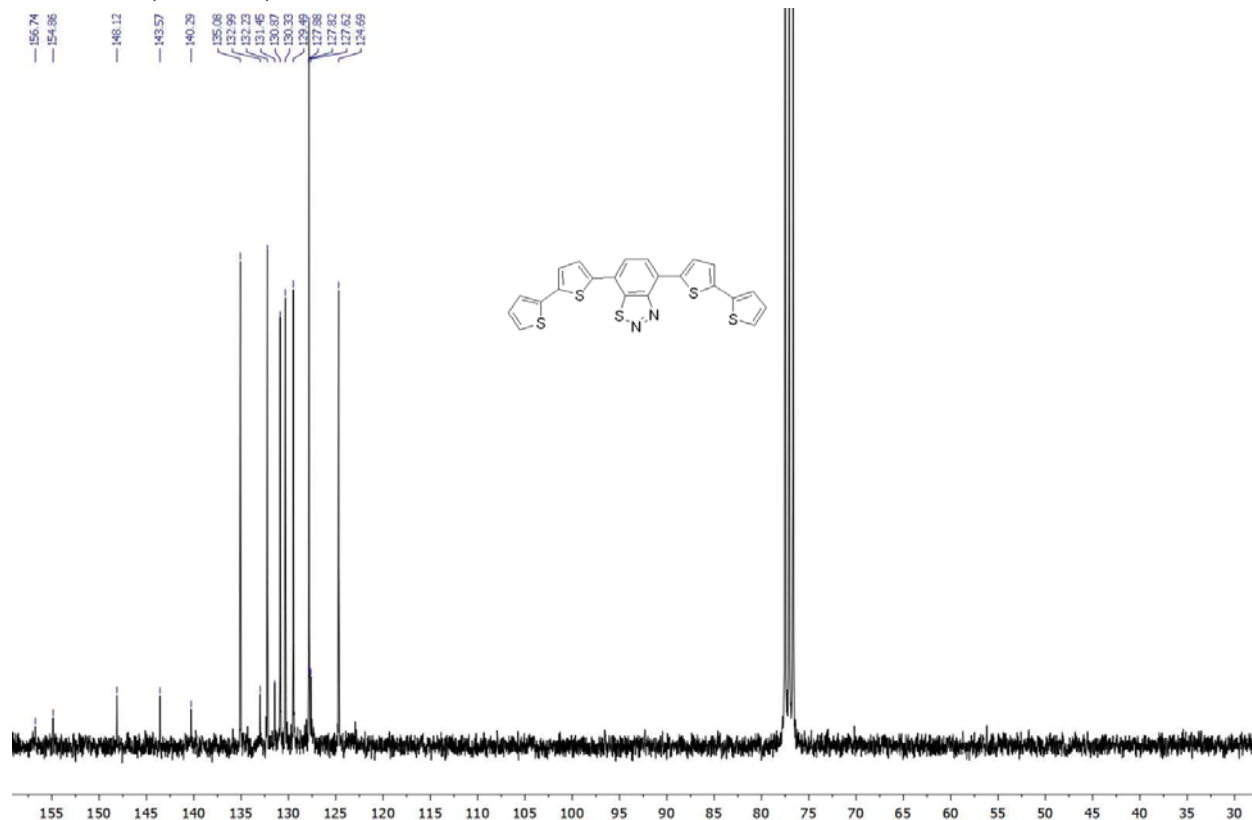

**4,7-bis(2,3-dihydrothieno[3,4-b][1,4]dioxin-5-yl)benzo[d][1,2,3]thiadiazole (3e)**

**<sup>1</sup>H NMR (300 MHz)**

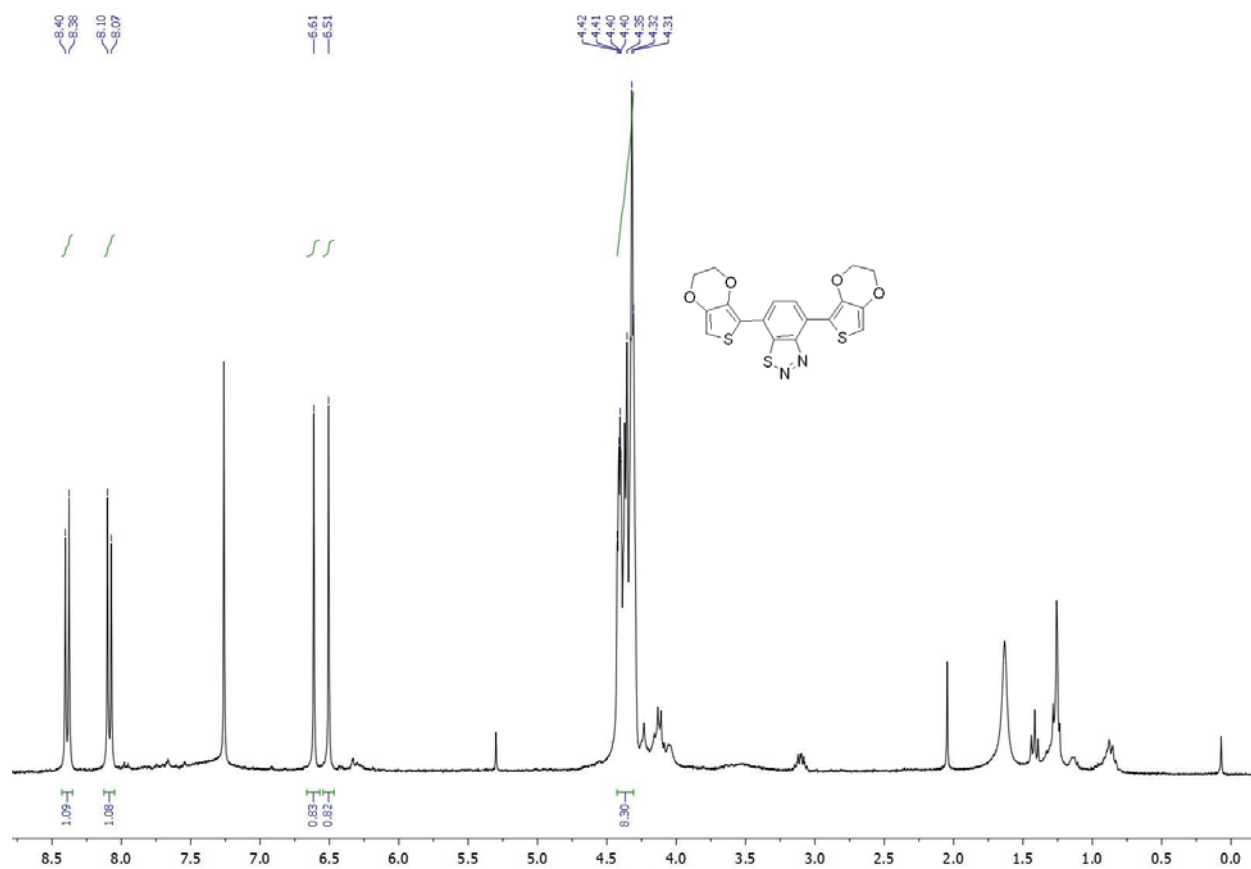

**<sup>13</sup>C NMR (75 MHz)**

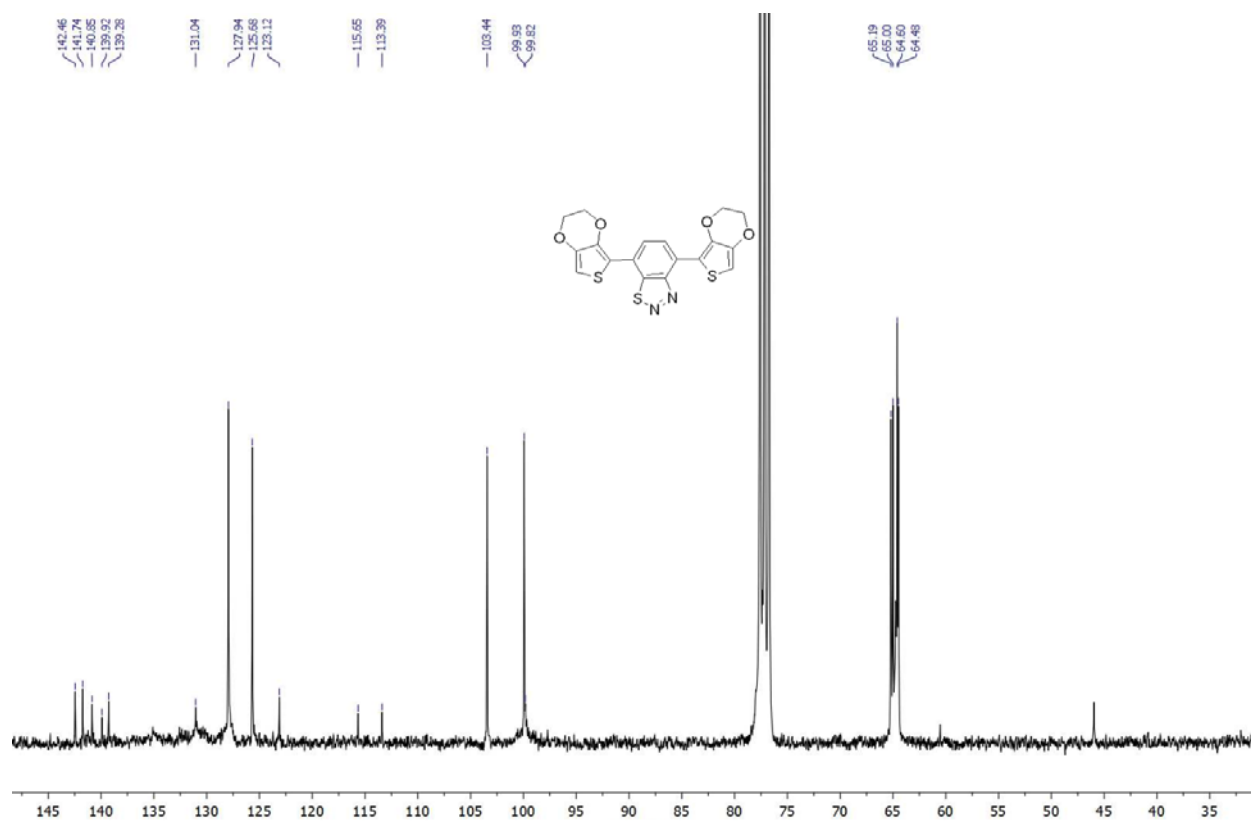

**4-(4,4-bis(2-ethylhexyl)-4H-cyclopenta[2,1-b:3,4-b']dithiophen-2-yl)-7-(7,7-bis(2-ethylhexyl)-7H-cyclopenta[1,2-b:4,3-b']dithiophen-2-yl)benzo[d][1,2,3]thiadiazole 3(f)**

**<sup>1</sup>H NMR (300 MHz)**

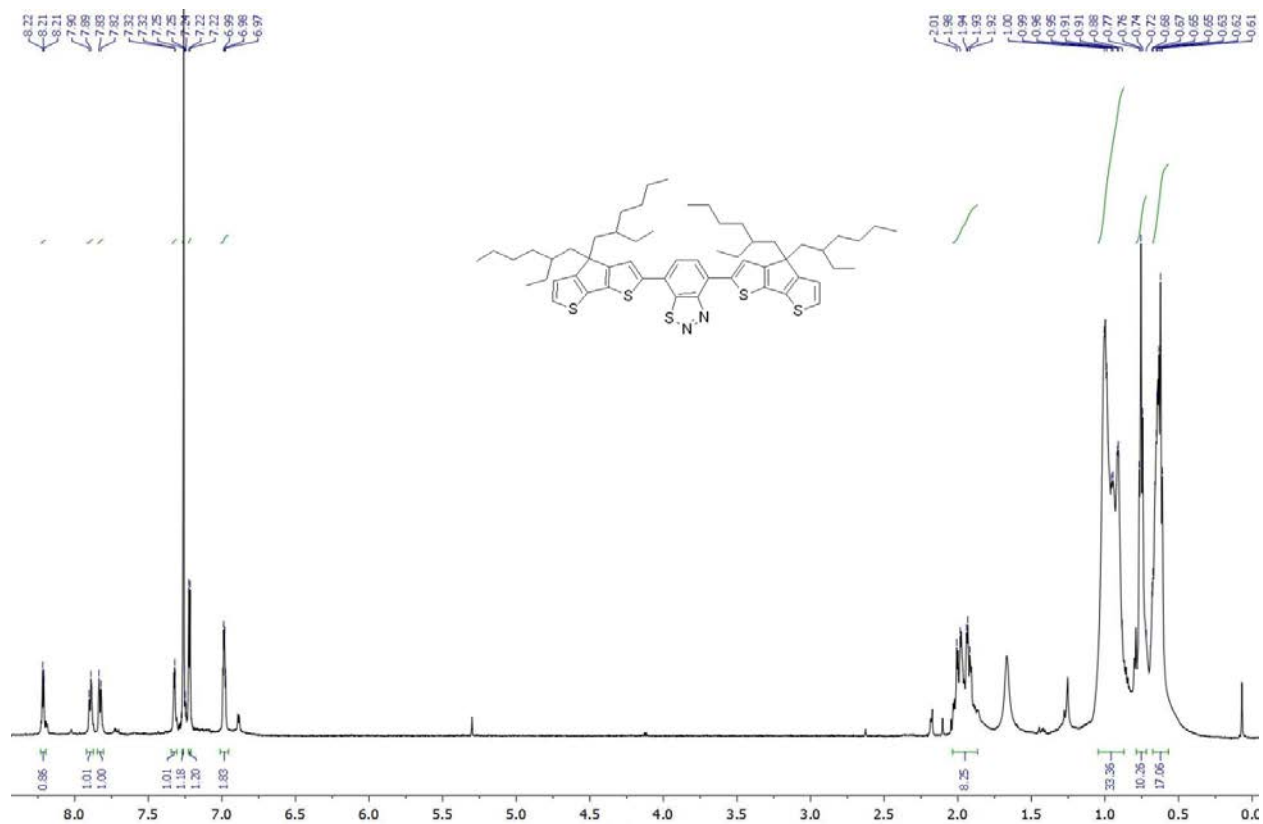

**<sup>13</sup>C NMR (75 MHz)**

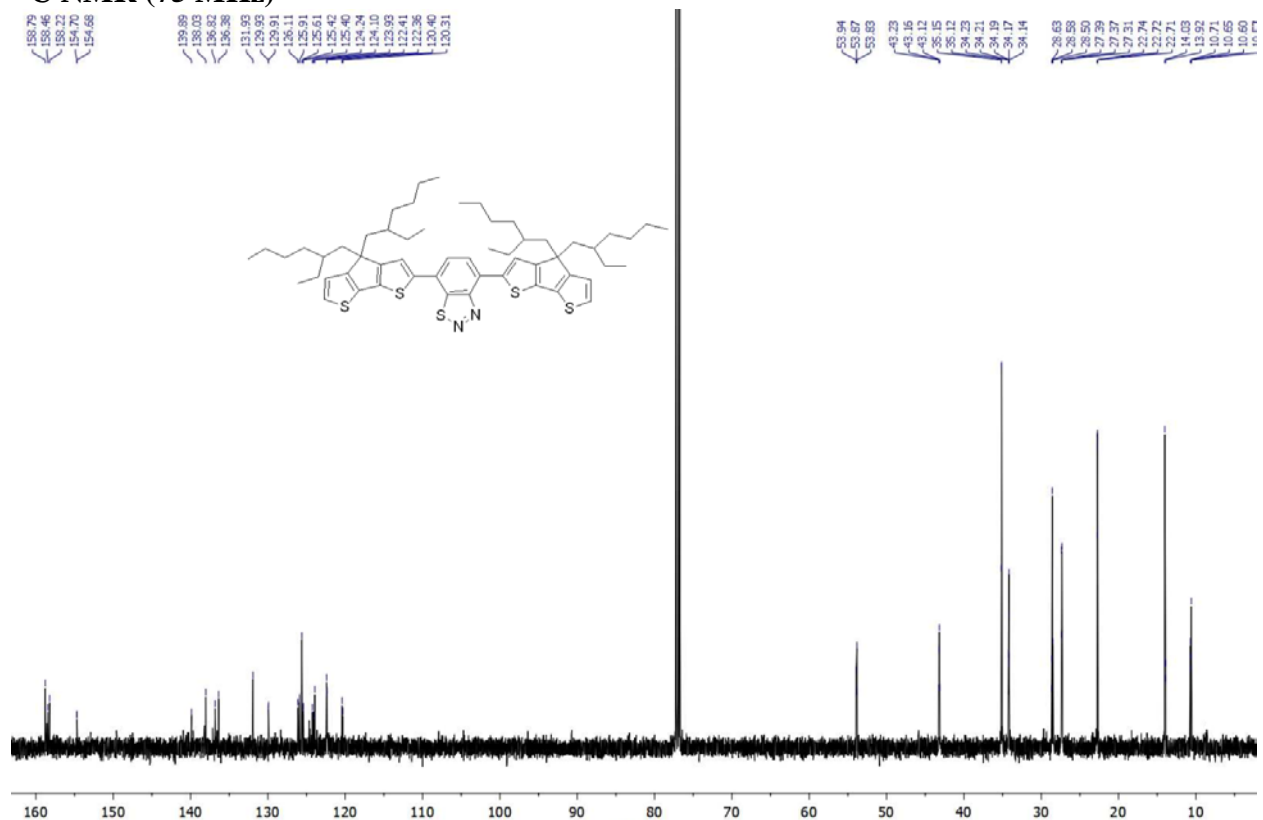

## 2. DFT calculations

DFT calculations were performed with the Gaussian 16 Rev C.01. M11 DFT functional with 6-31+g(d) basis set was used for all calculations. Calculations were performed in dichloromethane (PCM model). Data from various X-ray diffraction experiments were used as starting points for geometry optimizations. Cartesian coordinates are given in angstroms; absolute energies for all substances are given in hartrees. Analysis of vibrational frequencies was performed for all optimized structures. All compounds were characterized by only real vibrational frequencies. Wavefunction stability, using *stable* keyword, was also checked for each molecule.

For calculations of optimized geometries, frequencies, thermodynamics and MO energies following keywords were used:

```
# opt freq 6-31+g(d) scrf=(solvent=dichloromethane) nosymm m11
```



# Benzo[d][1,2,3]thiadiazole

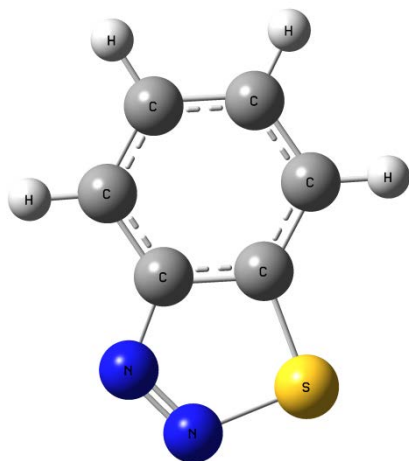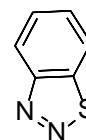

Charge 0; multiplicity 1

|   |            |            |             |
|---|------------|------------|-------------|
| N | 8.09236500 | 7.36061900 | 8.50926900  |
| C | 7.84273300 | 3.99915800 | 10.02589100 |
| C | 6.14424200 | 5.48723100 | 10.95643600 |
| C | 8.33577500 | 4.99246100 | 9.20557000  |
| C | 7.72294600 | 6.25541700 | 9.26135100  |
| C | 6.75464300 | 4.24813200 | 10.89377600 |
| C | 6.64353400 | 6.50178100 | 10.12276900 |
| H | 9.17350500 | 4.82232100 | 8.52910600  |
| H | 5.30596000 | 5.66947300 | 11.62820900 |
| H | 8.29507000 | 3.00700100 | 10.00811100 |
| H | 6.38709000 | 3.44200800 | 11.53060300 |
| N | 7.39644300 | 8.38840700 | 8.73075300  |
| S | 6.17509000 | 8.14385100 | 9.90675500  |

|                                                       |             |                  |
|-------------------------------------------------------|-------------|------------------|
| DFT M11/ 6-31+g(d) solvent dichloromethane, PCM model |             |                  |
| Total electronic energy=                              | -738.491320 | $E_0$            |
| Sum of electronic and zero-point Energies=            | -738.400389 | $E_0 + E_{ZPE}$  |
| Sum of electronic and thermal Energies=               | -738.394211 | $E_0 + E_{tot}$  |
| Sum of electronic and thermal Enthalpies=             | -738.393266 | $E_0 + H_{corr}$ |
| Sum of electronic and thermal Free Energies=          | -738.431247 | $E_0 + G_{corr}$ |
| Zero-point correction ( <i>unscaled</i> ) =           | 0.090931    |                  |
| E HOMO, -9.45 eV                                      |             |                  |
| E LUMO, -0.13 eV                                      |             |                  |
| E gap, 9.32 eV                                        |             |                  |

HOMO:

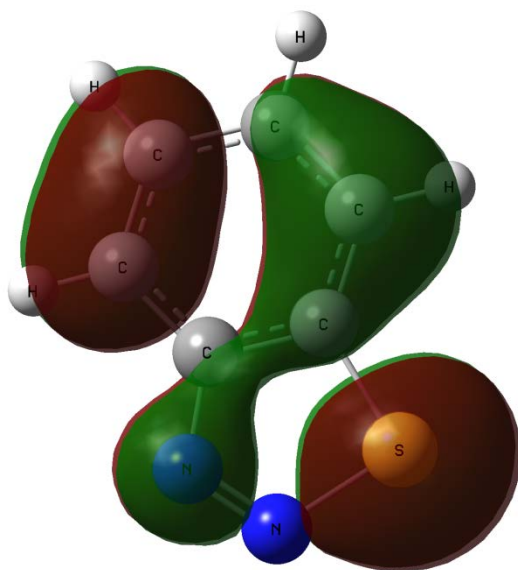

LUMO:

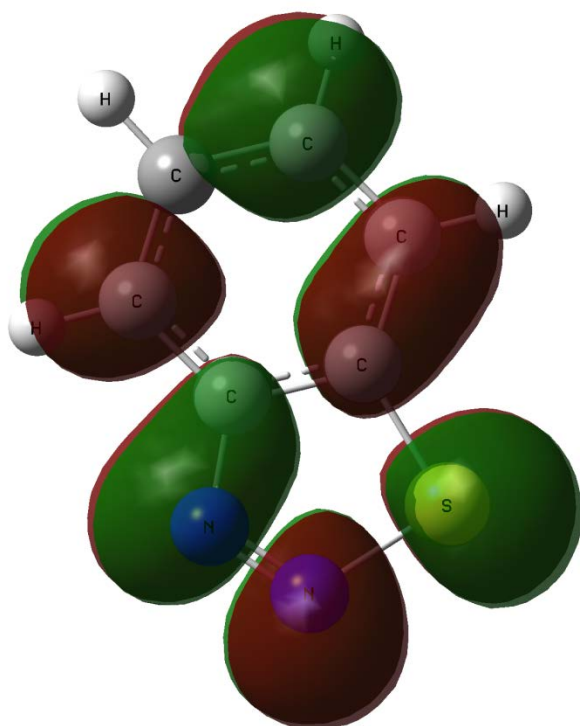

# Benzo[c][1,2,5]thiadiazole

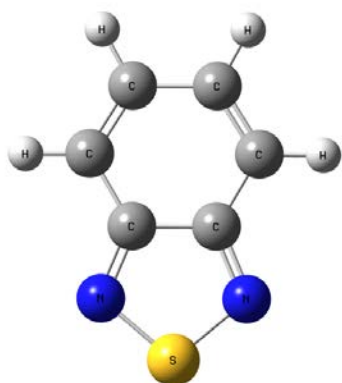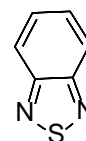

Charge 0; multiplicity 1

|   |            |            |             |
|---|------------|------------|-------------|
| S | 7.17487500 | 8.54737300 | 8.86790800  |
| N | 6.24587100 | 7.81089200 | 9.97437900  |
| N | 8.15379900 | 7.31714500 | 8.47284900  |
| C | 7.84242900 | 4.01434000 | 10.01884100 |
| C | 6.14992400 | 5.53300700 | 10.93371100 |
| C | 8.36937600 | 4.95922900 | 9.18880000  |
| C | 7.78381100 | 6.26347400 | 9.20578100  |
| C | 6.73309700 | 4.30113900 | 10.89076400 |
| C | 6.67561400 | 6.55036300 | 10.07766300 |
| H | 9.20863500 | 4.75043000 | 8.52572200  |
| H | 5.30986800 | 5.75793400 | 11.59052500 |
| H | 8.26616100 | 3.00942100 | 10.03027600 |
| H | 6.35593800 | 3.50311400 | 11.53138200 |

|                                                       |                                                |
|-------------------------------------------------------|------------------------------------------------|
| DFT M11/ 6-31+g(d) solvent dichloromethane, PCM model |                                                |
| Total electronic energy=                              | -738.501331 E <sub>0</sub>                     |
| Sum of electronic and zero-point Energies=            | -738.410029 E <sub>0</sub> + E <sub>ZPE</sub>  |
| Sum of electronic and thermal Energies=               | -738.403981 E <sub>0</sub> + E <sub>tot</sub>  |
| Sum of electronic and thermal Enthalpies=             | -738.403037 E <sub>0</sub> + H <sub>corr</sub> |
| Sum of electronic and thermal Free Energies=          | -738.440767 E <sub>0</sub> + G <sub>corr</sub> |
| Zero-point correction ( <i>unscaled</i> ) =           | 0.091302                                       |
| E HOMO, -9.38 eV                                      |                                                |
| E LUMO, -0.71 eV                                      |                                                |
| E gap, 8.67 eV                                        |                                                |

HOMO:

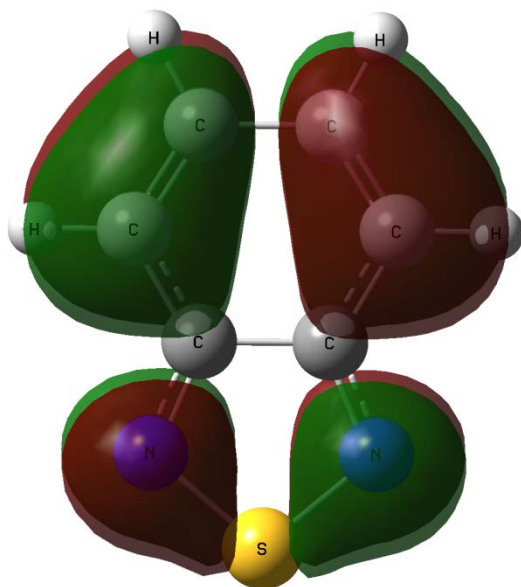

LUMO:

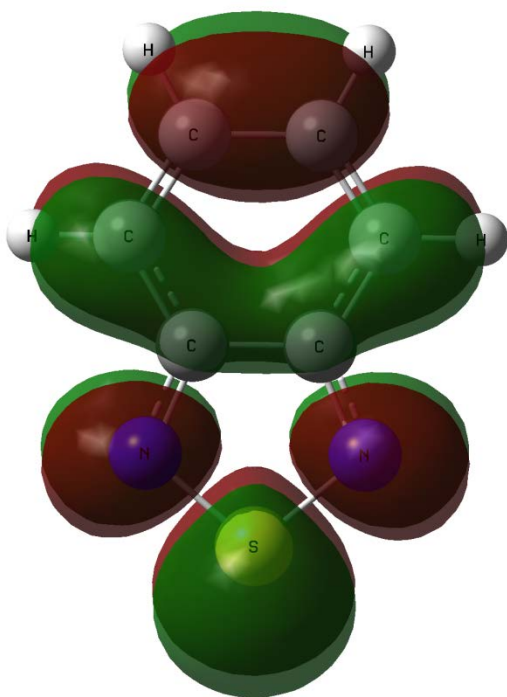

# 5,6-difluorobenzo[c][1,2,5]thiadiazole

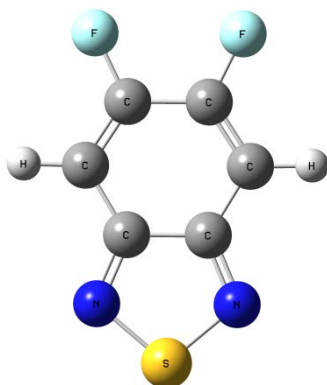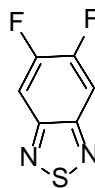

Charge 0; multiplicity 1

|   |            |            |             |
|---|------------|------------|-------------|
| S | 7.16425700 | 8.53998500 | 8.87136100  |
| N | 6.24376800 | 7.79661600 | 9.98063500  |
| N | 8.14730500 | 7.31368300 | 8.47252300  |
| C | 7.85729900 | 4.03750200 | 10.00665700 |
| C | 6.15215000 | 5.52875600 | 10.94330000 |
| C | 8.38713400 | 4.96262300 | 9.17469800  |
| C | 7.78621600 | 6.26066000 | 9.20386600  |
| C | 6.75088900 | 4.31776600 | 10.88179300 |
| C | 6.67869400 | 6.54162200 | 10.08097000 |
| F | 6.33693500 | 3.29099900 | 11.65016100 |
| F | 8.34527000 | 2.78255800 | 10.06153500 |
| H | 9.22480300 | 4.73033700 | 8.51980200  |
| H | 5.31558300 | 5.71989400 | 11.61270300 |

|                                                       |                                                |
|-------------------------------------------------------|------------------------------------------------|
| DFT M11/ 6-31+g(d) solvent dichloromethane, PCM model |                                                |
| Total electronic energy=                              | -936.941583 E <sub>0</sub>                     |
| Sum of electronic and zero-point Energies=            | -936.866853 E <sub>0</sub> + E <sub>ZPE</sub>  |
| Sum of electronic and thermal Energies=               | -936.859081 E <sub>0</sub> + E <sub>tot</sub>  |
| Sum of electronic and thermal Enthalpies=             | -936.858137 E <sub>0</sub> + H <sub>corr</sub> |
| Sum of electronic and thermal Free Energies=          | -936.900090 E <sub>0</sub> + G <sub>corr</sub> |
| Zero-point correction ( <i>unscaled</i> ) =           | 0.074730                                       |
| E HOMO, -9.75 eV                                      |                                                |
| E LUMO, -0.89 eV                                      |                                                |
| E gap, 8.87 eV                                        |                                                |

HOMO:

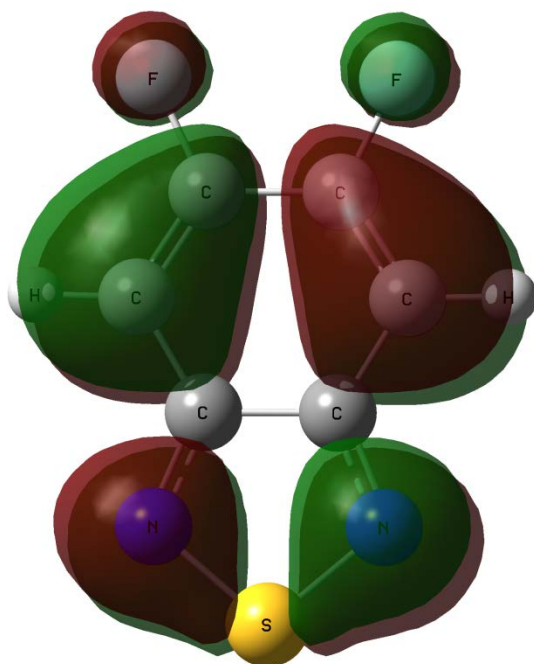

LUMO:

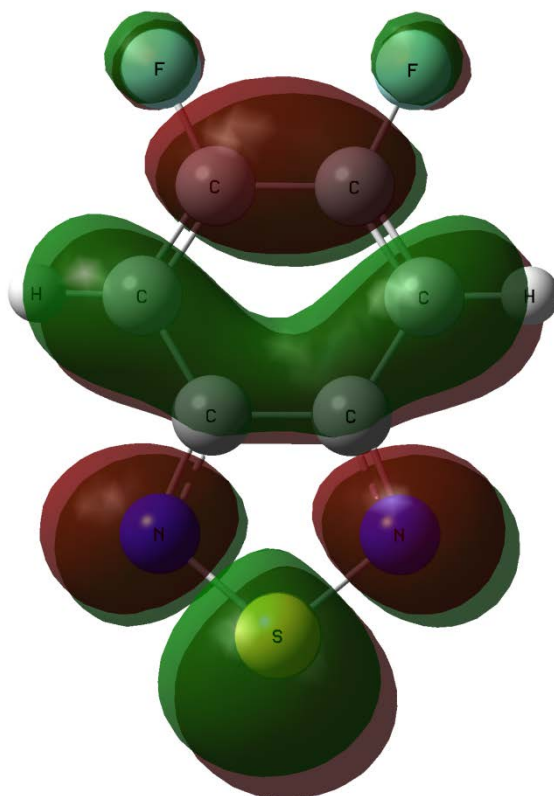

**[1,2,5]thiadiazolo[3,4-c]pyridine**

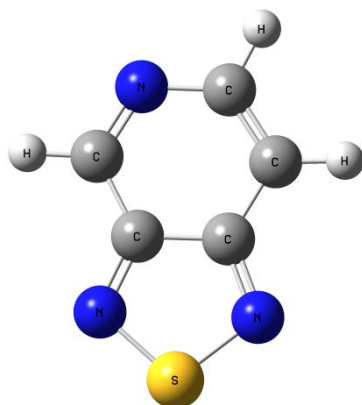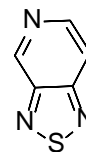

Charge 0; multiplicity 1

|   |             |            |            |
|---|-------------|------------|------------|
| S | -0.43390300 | 6.73815300 | 4.90136100 |
| N | 0.37067100  | 7.38876800 | 6.14888200 |
| N | -0.28548200 | 5.16881700 | 5.25916600 |
| C | 0.79490000  | 6.37532100 | 6.91084700 |
| C | 1.54728500  | 6.42464800 | 8.12044900 |
| C | 1.85216100  | 5.22960800 | 8.70274100 |
| H | 2.42575100  | 5.20061200 | 9.62985500 |
| N | 1.48881400  | 3.99176600 | 8.20965600 |
| C | 0.80153000  | 3.91697000 | 7.10703900 |
| C | 0.41448200  | 5.09776900 | 6.39471400 |
| H | 1.86079000  | 7.37327100 | 8.55340400 |
| H | 0.51965700  | 2.93196800 | 6.72666900 |

|                                                       |                                                |
|-------------------------------------------------------|------------------------------------------------|
| DFT M11/ 6-31+g(d) solvent dichloromethane, PCM model |                                                |
| Total electronic energy=                              | -754.539108 E <sub>0</sub>                     |
| Sum of electronic and zero-point Energies=            | -754.459470 E <sub>0</sub> + E <sub>ZPE</sub>  |
| Sum of electronic and thermal Energies=               | -754.453557 E <sub>0</sub> + E <sub>tot</sub>  |
| Sum of electronic and thermal Enthalpies=             | -754.452613 E <sub>0</sub> + H <sub>corr</sub> |
| Sum of electronic and thermal Free Energies=          | -754.490164 E <sub>0</sub> + G <sub>corr</sub> |
| Zero-point correction ( <i>unscaled</i> ) =           | 0.079637                                       |
| E HOMO, -9.80 eV                                      |                                                |
| E LUMO, -1.05 eV                                      |                                                |
| E gap, 8.75 eV                                        |                                                |

HOMO:

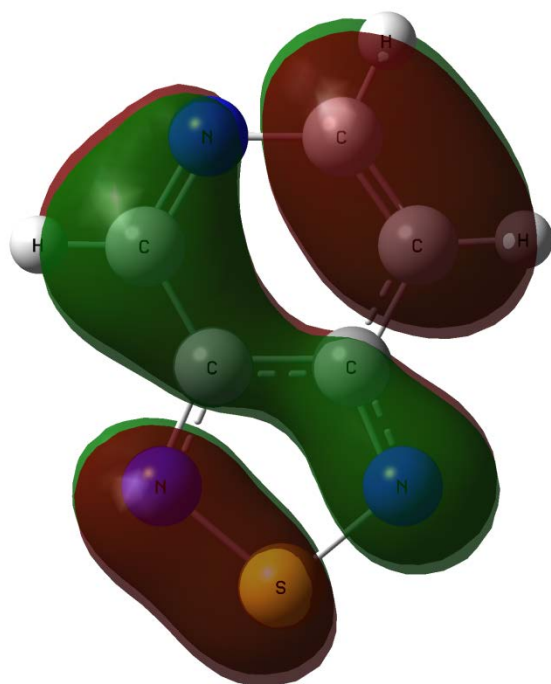

LUMO:

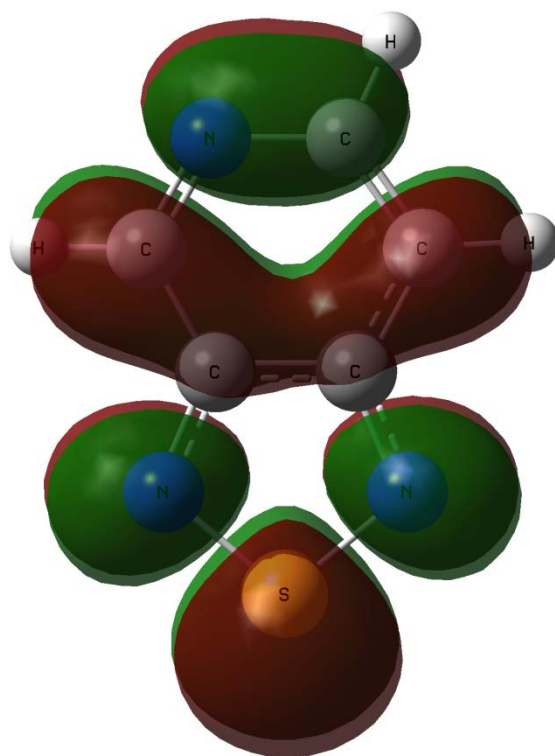



**[1,2,5]thiadiazolo[3,4-d]pyridazine**

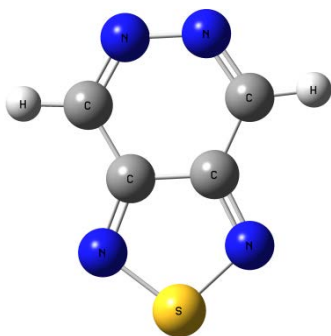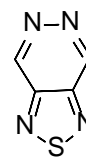

Charge 0; multiplicity 1

|   |            |             |             |
|---|------------|-------------|-------------|
| S | 5.35843200 | 9.85373100  | 16.81976300 |
| N | 4.33676100 | 8.61341200  | 17.01394300 |
| N | 4.59259400 | 10.67115900 | 15.65141700 |
| C | 3.48618400 | 9.98056200  | 15.37028500 |
| C | 2.46085700 | 10.26608500 | 14.41372200 |
| N | 1.43664600 | 9.47886300  | 14.26614300 |
| N | 1.29437100 | 8.34083400  | 15.02094400 |
| C | 2.17816500 | 8.00433900  | 15.91334600 |
| C | 3.33971800 | 8.80625600  | 16.14853500 |
| H | 2.50816100 | 11.15319600 | 13.78002300 |
| H | 1.99951200 | 7.08676300  | 16.47638000 |

|                                                       |                                                |
|-------------------------------------------------------|------------------------------------------------|
| DFT M11/ 6-31+g(d) solvent dichloromethane, PCM model |                                                |
| Total electronic energy=                              | -770.547491 E <sub>0</sub>                     |
| Sum of electronic and zero-point Energies=            | -770.480173 E <sub>0</sub> + E <sub>ZPE</sub>  |
| Sum of electronic and thermal Energies=               | -770.474319 E <sub>0</sub> + E <sub>tot</sub>  |
| Sum of electronic and thermal Enthalpies=             | -770.473375 E <sub>0</sub> + H <sub>corr</sub> |
| Sum of electronic and thermal Free Energies=          | -770.510886 E <sub>0</sub> + G <sub>corr</sub> |
| Zero-point correction ( <i>unscaled</i> ) =           | 0.067318                                       |
| E HOMO, -10.33 eV                                     |                                                |
| E LUMO, -1.34 eV                                      |                                                |
| E gap, 8.99 eV                                        |                                                |

HOMO:

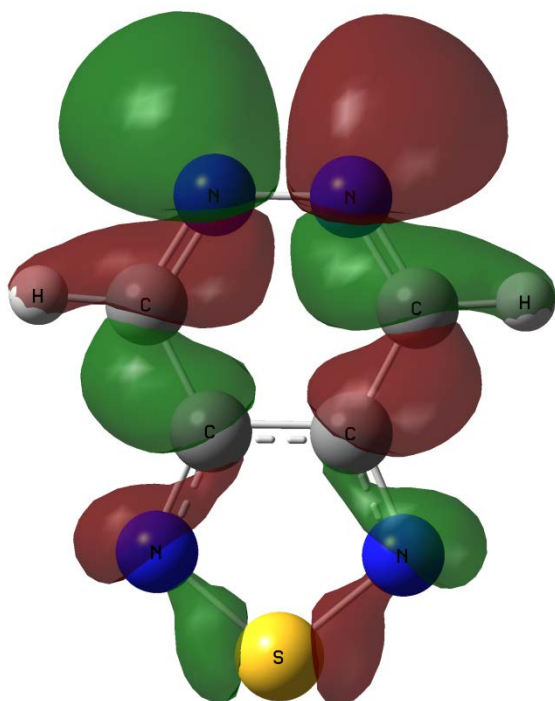

LUMO:

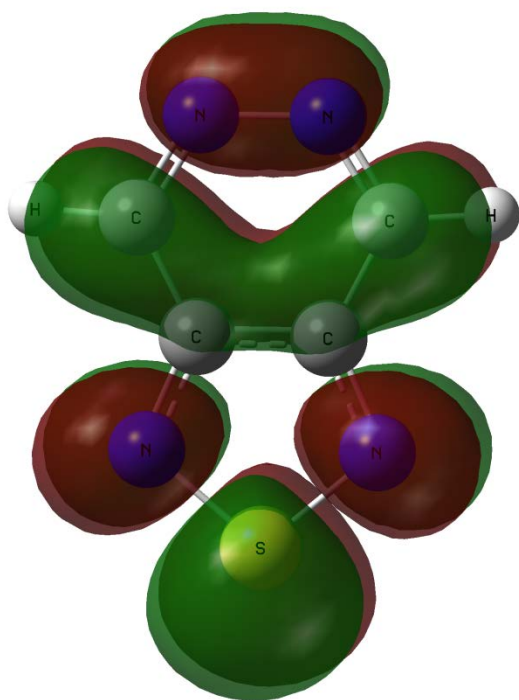

**Benzo[1,2-c:4,5-c']bis([1,2,5]thiadiazole)**

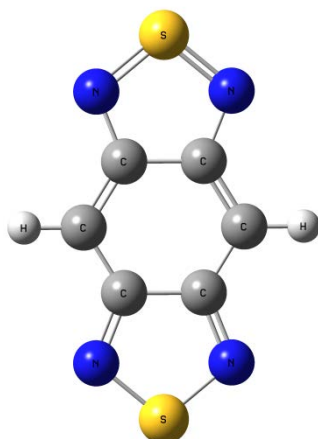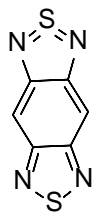

Charge 0; multiplicity 1

|   |             |            |             |
|---|-------------|------------|-------------|
| S | 14.71994100 | 1.10676300 | 7.90031500  |
| S | 13.53694700 | 5.44711800 | 13.13946500 |
| N | 15.70196500 | 2.17699400 | 8.56746400  |
| N | 13.39170300 | 1.30697600 | 8.76644400  |
| N | 14.86509400 | 5.24704900 | 12.27322700 |
| N | 12.55487300 | 4.37704300 | 12.47219800 |
| C | 15.01058600 | 2.78977800 | 9.56373300  |
| C | 15.49824600 | 3.79337200 | 10.40129700 |
| C | 14.60545100 | 4.27659500 | 11.35838300 |
| C | 13.24608800 | 3.76457900 | 11.47559900 |
| C | 12.75827900 | 2.76127800 | 10.63779700 |
| C | 13.65120500 | 2.27781800 | 9.68093000  |
| H | 16.51354700 | 4.17606900 | 10.31336100 |
| H | 11.74289200 | 2.37877100 | 10.72549300 |

|                                                       |                               |
|-------------------------------------------------------|-------------------------------|
| DFT M11/ 6-31+g(d) solvent dichloromethane, PCM model |                               |
| Total electronic energy=                              | -1244.88450 $E_0$             |
| Sum of electronic and zero-point Energies=            | -1244.803405 $E_0 + E_{ZPE}$  |
| Sum of electronic and thermal Energies=               | -1244.795603 $E_0 + E_{tot}$  |
| Sum of electronic and thermal Enthalpies=             | -1244.794659 $E_0 + H_{corr}$ |
| Sum of electronic and thermal Free Energies=          | -1244.837088 $E_0 + G_{corr}$ |
| Zero-point correction ( <i>unscaled</i> ) =           | 0.081092                      |
| E HOMO, -8.68 eV                                      |                               |
| E LUMO, -1.99 eV                                      |                               |
| E gap, 6.69 eV                                        |                               |

HOMO:

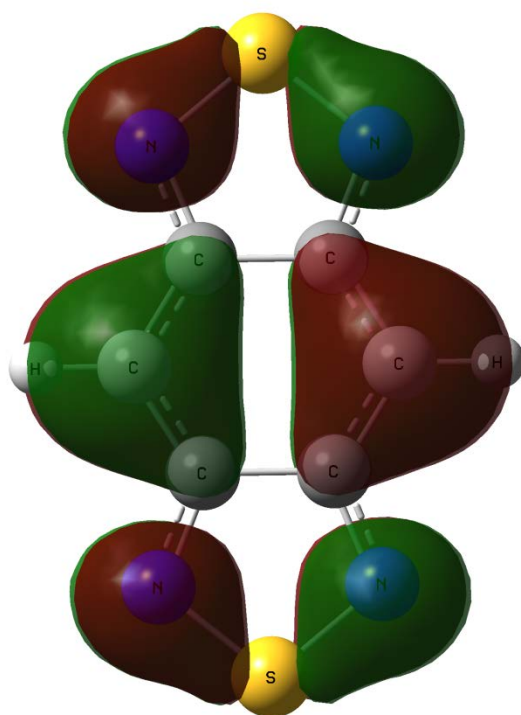

LUMO:

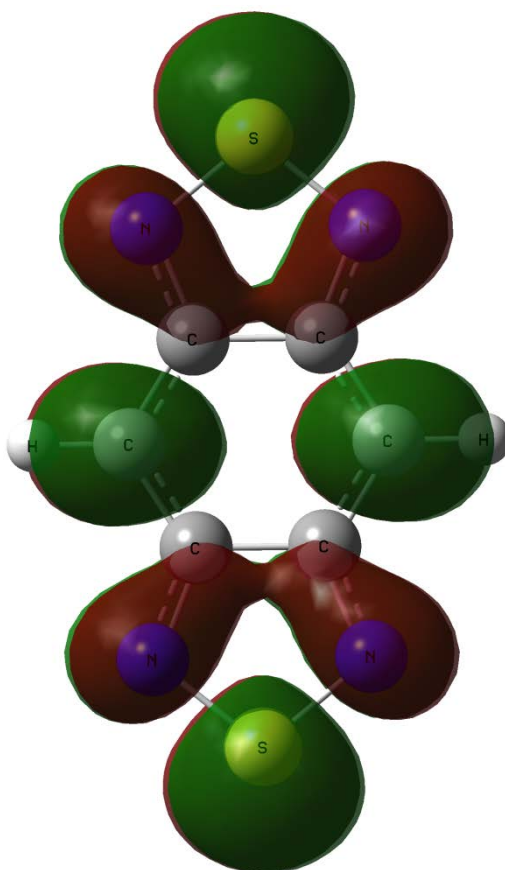

Supplement: s1 [file s1]
